# Supplementary material
Source: publisher figshare collection journal article supplement (https://karger.figshare.com/ndownloader/files/8955832)
Supplement: Supplementary file 1 [file 8955832]

## Erratum

---

Please note that the correct title of the article by Isik et al., *Pediatr Neurosurg* 2010;46:110–119 (DOI:10.1159/000319007) should read:

**Currarino Triad: Surgical Management and Follow-Up Results of Four Cases**
